# Supplementary material for: Characterization of Znq+–imidazole (q = 0, 1, 2) organometallic complexes: DFT methods vs. standard and explicitly correlated post-Hartree–Fock methods
Source: Royal Society of Chemistry journal article supplement (doi:10.1039/c4cp06108j), 2015-01-01
Supplement: c4cp06108j1.pdf [file c4cp06108j1.pdf]

**Table S1:** BSSE corrected binding energies (BEs, kcal/mol<sup>-1</sup>) of ZnX (X = He, Ne, Ar) complexes computed at different levels of theories. D3 is when dispersion is included.

| basis sets  | 6-311++G(d,p) |        |        |         |        |           | 6-311++G(d,p) | aug-cc-pVDZ |        |         | aug-cc-pVTZ |         | aug-cc-pVDZ |         | aug-cc-pVTZ |         | aug-cc-pVTZ(-PP) |                |             |        |            |         |
|-------------|---------------|--------|--------|---------|--------|-----------|---------------|-------------|--------|---------|-------------|---------|-------------|---------|-------------|---------|------------------|----------------|-------------|--------|------------|---------|
|             | PBE           | PBE+D3 | PBE0   | PBE0+D3 | M05-2X | M05-2X+D3 |               | (R)MP2      | (R)MP2 | SCS-MP2 | (R)MP2      | SCS-MP2 | (R)CCSD(T)  | (R)CCSD | (R)CCSD(T)  | (R)CCSD | (R)MP2-F12       | (R)CCSD(T)-F12 | (R)CCSD-F12 | (R)MP2 | (R)CCSD(T) | (R)CCSD |
| <b>ZnHe</b> | -0.055        | -0.118 | -0.027 | -0.084  | -0.006 | -0.0705   | 0.018         | -0.043      | -0.002 | -0.029  | -0.100      | -0.0351 | -0.028      | -0.020  | -0.016      | -0.022  | -0.013           | -0.009         | -0.030      | -0.025 | -0.020     |         |
| <b>ZnNe</b> | -0.164        | -0.335 | -0.073 | -0.225  | -0.006 | -0.162    | 0.074         | -0.117      | -0.008 | -0.090  | -0.024      | -0.073  | -0.088      | -0.097  | -0.055      | -0.064  | -0.098           | -0.039         | -0.080      | -0.112 | -0.061     |         |
| <b>ZnAr</b> | -0.152        | -0.458 | -0.090 | -0.358  | -0.158 | -0.466    | 0.149         | -0.360      | -0.097 | -0.359  | -0.161      | -0.249  | -0.197      | -0.216  | -0.153      | -0.457  | -0.276           | -0.201         | -0.372      | -0.230 | -0.164     |         |

**Table S2: Calculated vibrational stretching frequencies (scaled) for Zn<sup>q</sup>Im (q = 0, 1, 2) at the different levels of theories**

| Basis set                  | 6-311 <sup>++</sup> G (d,p) |           |           |           | aug-cc-pVDZ |
|----------------------------|-----------------------------|-----------|-----------|-----------|-------------|
| Method                     | PBE                         | PBE0      | M05-2X    | (R)MP2    | (R)MP2      |
| <b>Zn<sup>0</sup>Im I</b>  | i 11.4663                   | 18.8118   | 14.0349   | 1.26      | 16.96       |
|                            | i 6.8682                    | 25.8151   | 40.5874   | 13.73     | 29.45       |
|                            | 38.5878                     | 38.7095   | 47.532    | 38.35     | 47.86       |
|                            | 514.1728                    | 544.5766  | 552.0092  | 416.68    | 560.77      |
|                            | 622.4882                    | 646.9748  | 652.6995  | 597.7521  | 641.73      |
|                            | 658.5848                    | 683.4151  | 690.6685  | 656.3161  | 675.07      |
|                            | 693.9789                    | 739.6538  | 760.3668  | 673.8231  | 717.75      |
|                            | 760.6469                    | 822.2029  | 856.0938  | 734.1157  | 781.82      |
|                            | 821.8328                    | 874.0163  | 905.2724  | 776.0605  | 838.68      |
|                            | 877.7419                    | 912.8522  | 928.2574  | 900.7871  | 890.41      |
|                            | 914.7733                    | 948.9053  | 960.606   | 935.1276  | 926.74      |
|                            | 1048.529                    | 1088.0578 | 1094.3841 | 1086.765  | 1073.34     |
|                            | 1068.4052                   | 1110.4308 | 1112.9699 | 1105.827  | 1095.28     |
|                            | 1114.9415                   | 1158.9874 | 1162.6031 | 1155.555  | 1141.29     |
|                            | 1147.4388                   | 1194.2726 | 1192.8762 | 1186.615  | 1176.79     |
|                            | 1235.4781                   | 1285.5264 | 1301.8249 | 1279.928  | 1258.57     |
|                            | 1331.5792                   | 1392.9844 | 1400.5212 | 1373.732  | 1362.46     |
|                            | 1395.303                    | 1463.1135 | 1469.8821 | 1468.346  | 1461.7      |
|                            | 1457.3787                   | 1525.903  | 1539.0873 | 1508.917  | 1492.67     |
|                            | 1507.4693                   | 1579.1258 | 1599.0545 | 1538.755  | 1524.71     |
| 3176.531                   | 3264.616                    | 3291.3925 | 3284.409  | 3288.47   |             |
| 3181.8793                  | 3266.716                    | 3300.7227 | 3287.321  | 3290.68   |             |
| 3207.2501                  | 3296.7416                   | 3328.5978 | 3311.545  | 3314.2    |             |
| 3562.2267                  | 3695.185                    | 3731.9685 | 3677.366  | 3658.67   |             |
| <b>Zn<sup>0</sup>Im II</b> | 32.3936                     | 38.5903   | 63.1728   | 57.4513   | 68.4        |
|                            | 41.0987                     | 48.1598   | 73.1078   | 73.9008   | 80.87       |
|                            | 49.8285                     | 57.9776   | 85.3542   | 83.7195   | 88.09       |
|                            | 515.1714                    | 545.2387  | 565.9782  | 478.4243  | 555.77      |
|                            | 621.1065                    | 645.8377  | 652.4585  | 621.5976  | 634.06      |
|                            | 658.8458                    | 683.0429  | 688.5247  | 662.1847  | 667.63      |
|                            | 699.9191                    | 745.039   | 765.9596  | 704.4613  | 718.24      |
|                            | 766.1941                    | 826.3974  | 857.2556  | 773.9568  | 778.33      |
|                            | 830.9135                    | 882.9311  | 905.1257  | 828.1525  | 839.02      |
|                            | 874.0388                    | 909.3869  | 925.9267  | 896.5722  | 885.58      |
|                            | 913.8179                    | 948.1617  | 960.4227  | 933.7507  | 925.26      |
|                            | 1047.3071                   | 1086.9105 | 1094.5918 | 1085.2185 | 1071.38     |
|                            | 1068.2109                   | 1109.198  | 1110.7834 | 1105.2888 | 1094.23     |
|                            | 1112.9442                   | 1156.6818 | 1161.3614 | 1152.295  | 1137.33     |
|                            | 1148.4011                   | 1195.6156 | 1194.2851 | 1189.5542 | 1180.02     |
|                            | 1235.2201                   | 1284.1698 | 1300.5192 | 1278.3576 | 1256.86     |
|                            | 1328.7786                   | 1391.3699 | 1398.4001 | 1371.6207 | 1359.94     |
|                            | 1391.5992                   | 1459.3994 | 1466.9104 | 1464.5361 | 1457.57     |
|                            | 1452.4874                   | 1520.6441 | 1535.584  | 1503.109  | 1484.59     |
|                            | 1503.1255                   | 1575.4883 | 1596.2601 | 1534.5138 | 1519.36     |
| 3175.9789                  | 3264.0418                   | 3290.365  | 3282.5427 | 3286.88   |             |
| 3182.0064                  | 3268.2282                   | 3292.9979 | 3290.8367 | 3296.51   |             |
| 3207.471                   | 3296.9175                   | 3326.1862 | 3310.1059 | 3313.12   |             |
| 3563.9255                  | 3695.5                      | 3736.3238 | 3673.3381 | 3654.75   |             |
|                            | 109.3218                    | 115.2421  | 111.9697  | 104.1672  | 171.84      |
|                            | 147.2355                    | 150.4366  | 141.4261  | 148.1188  | 199.28      |

|                          |           |           |           |           |         |
|--------------------------|-----------|-----------|-----------|-----------|---------|
| <b>Zn<sup>+1</sup>Im</b> | 242.9724  | 256.7299  | 251.3139  | 258.0019  | 239.06  |
|                          | 602.7606  | 628.8742  | 635.9972  | 578.5787  | 639.55  |
|                          | 628.6994  | 657.5082  | 664.0099  | 616.3143  | 659.4   |
|                          | 673.617   | 706.488   | 714.6921  | 685.5693  | 740.45  |
|                          | 728.1497  | 772.5844  | 789.2046  | 731.6078  | 830.41  |
|                          | 785.6269  | 851.0377  | 884.5063  | 779.458   | 868.81  |
|                          | 840.4271  | 893.0732  | 918.9782  | 803.3392  | 921.78  |
|                          | 902.2778  | 936.7161  | 945.7404  | 927.7139  | 935.2   |
|                          | 929.9663  | 967.7553  | 978.4468  | 958.1113  | 970.34  |
|                          | 1061.762  | 1103.0333 | 1104.6843 | 1107.0112 | 1123.93 |
|                          | 1096.1566 | 1134.8975 | 1145.5764 | 1129.0842 | 1163.38 |
|                          | 1127.5093 | 1167.9968 | 1160.8265 | 1171.7515 | 1193.51 |
|                          | 1174.8324 | 1221.7855 | 1225.8735 | 1216.5948 | 1232.67 |
|                          | 1249.1958 | 1300.7289 | 1314.4136 | 1290.1553 | 1311.99 |
|                          | 1322.5098 | 1381.5321 | 1388.531  | 1377.1385 | 1392.82 |
|                          | 1421.4547 | 1484.6303 | 1491.2168 | 1479.1072 | 1478.55 |
|                          | 1488.2796 | 1561.2324 | 1574.4053 | 1553.5967 | 1543.67 |
|                          | 1537.0017 | 1603.9934 | 1621.2845 | 1575.7984 | 1566.89 |
|                          | 3204.4619 | 3287.3616 | 3305.0792 | 3301.4586 | 3314.79 |
|                          | 3207.9375 | 3288.795  | 3310.9722 | 3305.9235 | 3327.65 |
| 3225.1549                | 3310.6217 | 3340.254  | 3324.1007 | 3345.24   |         |
| 3537.1001                | 3654.3355 | 3680.7093 | 3632.2637 | 3636.34   |         |
| <b>Zn<sup>+2</sup>Im</b> | 137.4516  | 113.0222  | 126.7848  | 116.5451  | 122.6   |
|                          | 202.6901  | 205.7757  | 196.4812  | 202.5933  | 199.33  |
|                          | 324.4337  | 343.4863  | 347.1748  | 347.8672  | 350.08  |
|                          | 574.9537  | 581.4278  | 623.8626  | 573.0083  | 600.92  |
|                          | 609.0926  | 626.3846  | 635.8827  | 601.7992  | 623.83  |
|                          | 706.022   | 722.8258  | 765.0427  | 715.016   | 735     |
|                          | 765.7556  | 751.7094  | 770.9729  | 738.882   | 759.67  |
|                          | 800.8158  | 862.9458  | 898.8832  | 797.2633  | 816.34  |
|                          | 872.8644  | 894.9447  | 925.5143  | 824.7684  | 853.01  |
|                          | 877.7578  | 915.329   | 928.7759  | 911.5714  | 903.78  |
|                          | 921.1932  | 963.5334  | 978.2126  | 955.4194  | 949.09  |
|                          | 1051.9544 | 1099.6723 | 1104.5681 | 1106.1816 | 1095.19 |
|                          | 1100.6148 | 1138.2196 | 1132.0633 | 1138.162  | 1128.72 |
|                          | 1106.0537 | 1151.3794 | 1159.7917 | 1153.4907 | 1145.12 |
|                          | 1189.8322 | 1237.9412 | 1245.6903 | 1232.9364 | 1220.74 |
|                          | 1242.888  | 1298.778  | 1309.665  | 1282.0925 | 1268.74 |
|                          | 1282.4408 | 1342.9628 | 1353.4492 | 1351.9604 | 1342.17 |
|                          | 1419.7155 | 1486.1408 | 1495.4853 | 1465.1248 | 1456.39 |
|                          | 1465.981  | 1543.405  | 1564.4095 | 1537.0598 | 1521.29 |
|                          | 1551.7253 | 1626.2583 | 1646.0858 | 1597.4214 | 1585.29 |
| 3181.3742                | 3273.9714 | 3294.6259 | 3290.0531 | 3291.53   |         |
| 3196.9727                | 3276.9916 | 3296.3089 | 3293.2178 | 3294.94   |         |
| 3208.4918                | 3294.3254 | 3315.1817 | 3308.2234 | 3310.36   |         |
| 3460.4084                | 3576.9557 | 3600.9424 | 3555.5947 | 3538.42   |         |
